# Supplementary material
Source: Springer Nature journal article supplement (https://www.springermedizin.de/resource/supplementary/12943_2007_328_MOESM6_ESM.pdf/9553936)

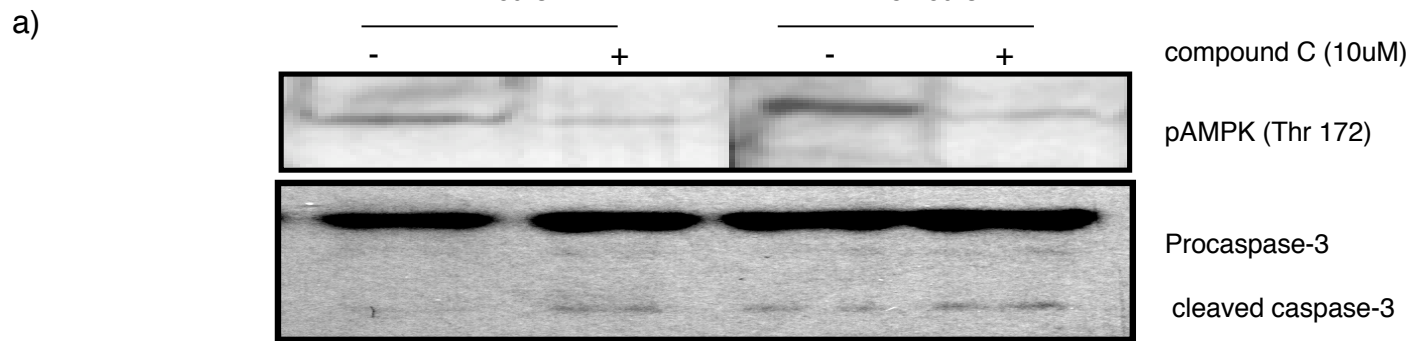

b)

AICAR ( mM )

0

0.5

1.0

72 hours

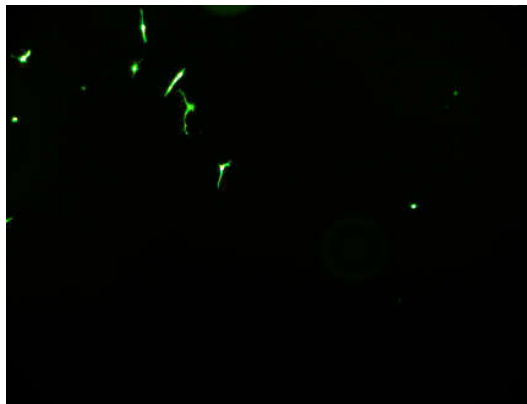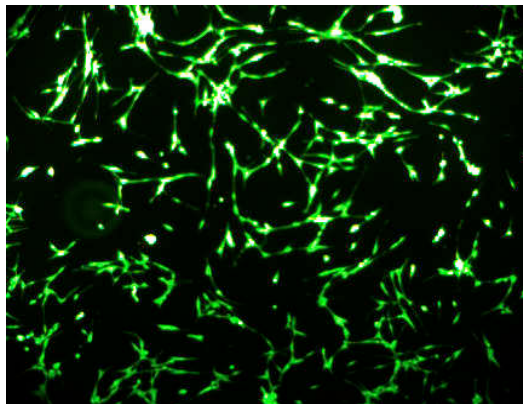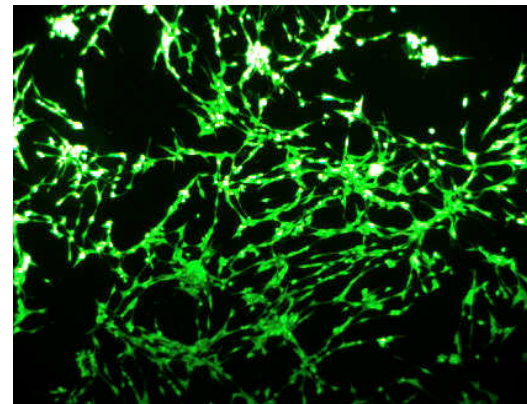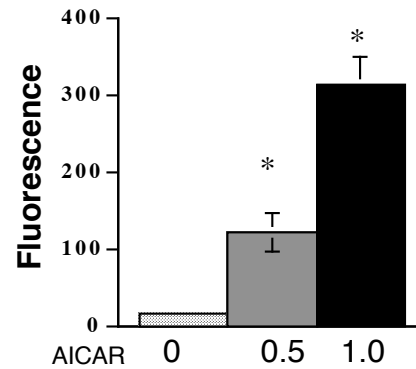

Supplement: MOESM6 [file 9553936]
